# Supplementary material for: A riboswitch gives rise to multi-generational phenotypic heterogeneity in an auxotrophic bacterium
Source: Nat Commun. 2020 Mar 5;11:1203. doi: 10.1038/s41467-020-15017-1 (PMC7058034; doi:10.1038/s41467-020-15017-1)
Supplement: Supplementary file 1 — Supplementary Information [file 41467_2020_15017_MOESM1_ESM.pdf]

## **Supplementary Information**

**A riboswitch gives rise to multi-generational phenotypic heterogeneity in an  
auxotrophic bacterium**

Hernandez-Valdes *et al.*

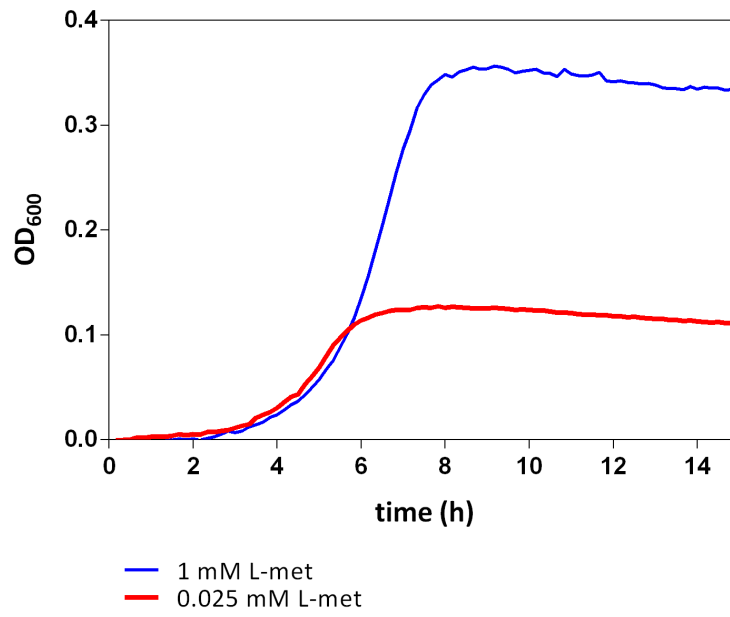

**Supplementary Figure 1 | Methionine concentration is limiting for the growth of *L. lactis*.** Growth curves (OD<sub>600</sub>) of *L. lactis* MG1363 in CDM with low and high concentrations of methionine (0.025 mM in red and 1 mM in blue).

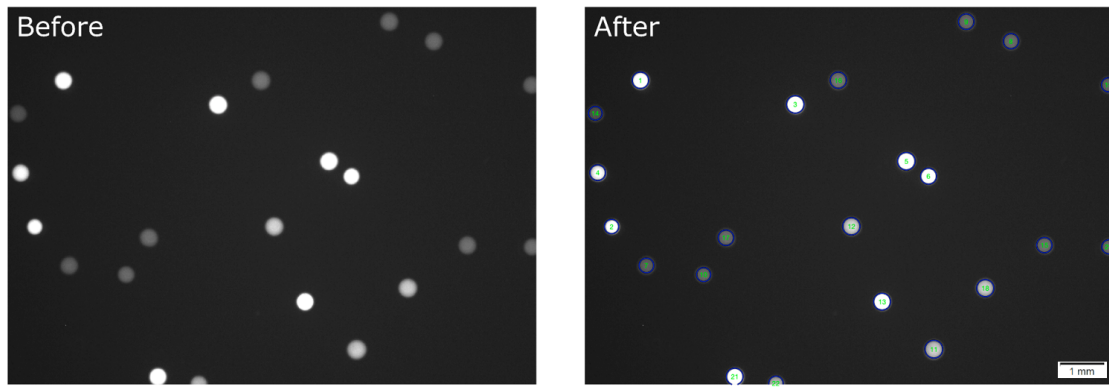

**Supplementary Figure 2 | Example of automatic colony detection.** *L. lactis* colonies on CDM-agar plate with low methionine concentration 0.025 mM show the two colony phenotypes (left image – before automatic detection), both phenotypes are efficiently detected (right-after detection). Scale bar, 1 mm.

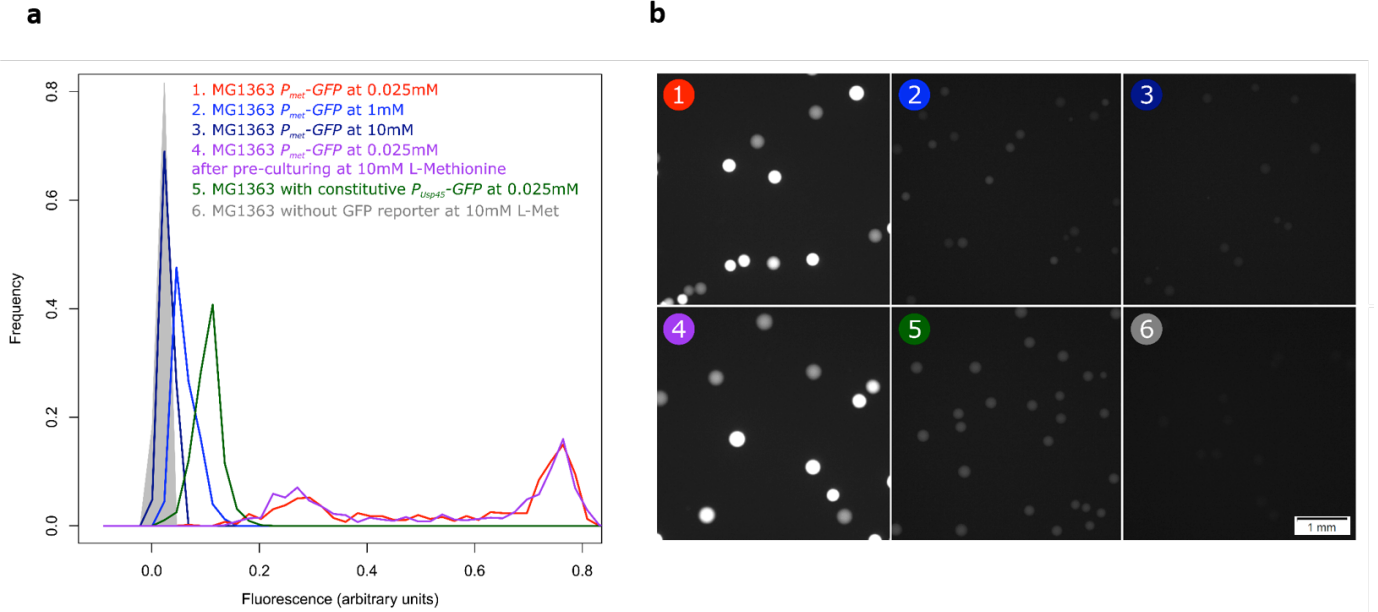

**Supplementary Figure 3 | Control data in the colony analysis.** **a**, Frequency of GFP+ and GFP- colonies using control strains and different growth conditions: 1-*Pmet-gfp* strain at low methionine concentration (0.025 mM, where the phenotypic heterogeneity is present), 2-*Pmet-gfp* strain at high methionine concentration (1 mM, no phenotypic heterogeneity, but low *met* expression), 3- *Pmet-gfp* strain at the highest methionine concentration (10mM, no phenotypic heterogeneity, and the lowest *met* expression), 4- *Pmet-gfp* strain at low methionine concentration (0.025 mM), but pre-cultured at high methionine concentration of 10 mM (phenotypic heterogeneity is present), 5- *Pusp45-gfp* strain at low methionine concentration (0.025 mM, homogenous expression of the constitutive *usp45* gene), 6- wild-type strain at high methionine concentration (10 mM), background fluorescence. **b**, examples of colonies on CDM-agar plate with the growth conditions tested in **a**. Scale bar, 1 mm.

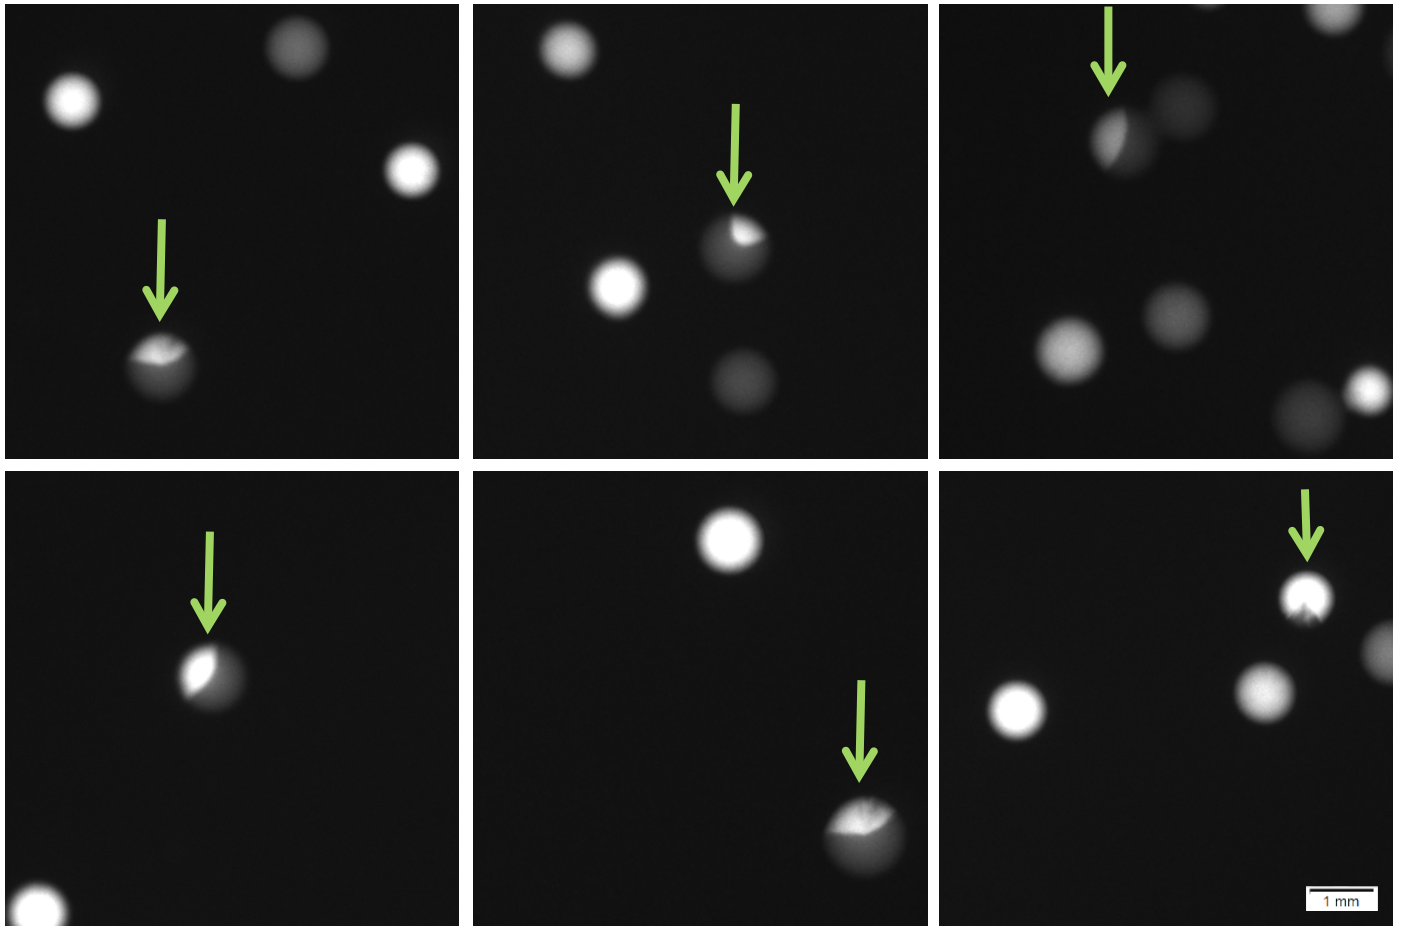

**Supplementary Figure 4 | Examples of the rarely observed switching in *L. lactis* *Pmet-gfp* colonies.** Colonies pointed by the green arrows show sectored and radial patterns in CDM-agar plates with low methionine concentrations (0.025 mM), inoculated with *L. lactis* cells and incubated for 48 h at 30 °C. Green fluorescence images are shown. Scale bar, 1 mm.

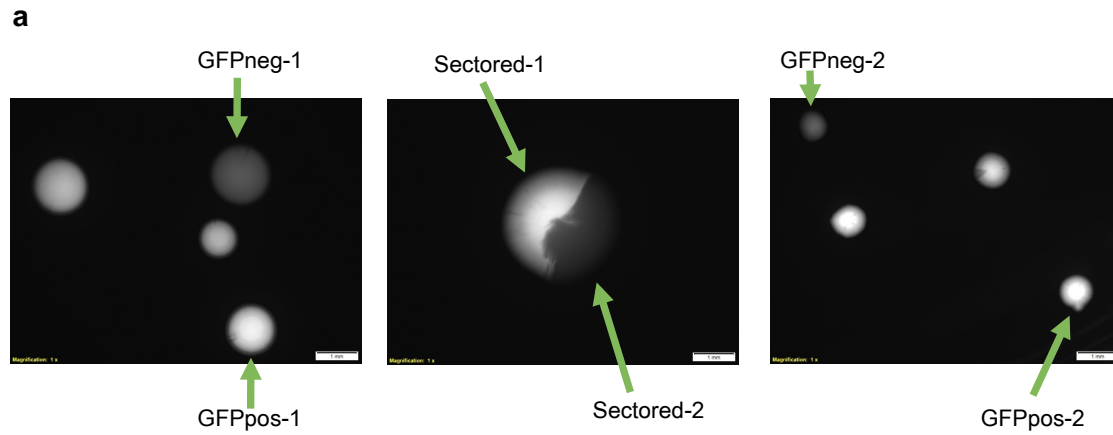

**b**

| <i>met</i> promoter sequencing |                 |                   |
|--------------------------------|-----------------|-------------------|
| Sample                         | Phenotype       | Percent Identity* |
| GFPpos-1                       | GFP+            | 100%              |
| GFPpos-2                       | GFP+            | 100%              |
| GFPneg-1                       | GFP-            | 100%              |
| GFPneg-2                       | GFP-            | 100%              |
| Sected-1                       | GFP+ (sectored) | 100%              |
| Sected-2                       | GFP- (sectored) | 100%              |

\* Obtained by alignment of the DNA sequences to the *met* promoter reference sequence (*L. Lactis* subsp. *cremoris* MG1363)

**c**

| Genomic DNA sequencing |            |               |                     |
|------------------------|------------|---------------|---------------------|
| Phenotype              | Annotation | Mapped reads* | Predicted mutations |
| GFP+                   | GFPpos-1   | 97.60%        | not found           |
| GFP-                   | GFPneg-1   | 99.00%        | not found           |
| GFP+ (sectored)        | Sected-1   | 98.30%        | not found           |
| GFP- (sectored)        | Sected-2   | 98.10%        | not found           |

\* Mapped reads using *Lactococcus lactis* subsp. *cremoris* MG1363, complete genome as reference.

**Supplementary Figure 5 | DNA sequencing of different colony phenotypes of *L. lactis* *Pmet-gfp*.** **a**, Colonies obtained in CDM-agar plates with low methionine concentrations (0.025 mM), inoculated with *L. lactis* *Pmet-gfp* cells and incubated for 48 h at 30 °C. Green arrows indicate the colony or sector of a colony taken to perform both, PCR colony and genomic DNA sequencing (see Methods). Green fluorescence images are shown. Scale bar, 1 mm. **b**, DNA sequencing of the *met* promoter, the percent identity value was obtained by alignment of the DNA sequences of the *met* promoter region in each colony (GFP+ indicated as GFPpos, GFP- indicated as GFPneg, and sectored colonies) by Clustal 2.1. The alignment was performed using the *met* promoter sequence as reference, and two samples per type of

colony. **c**, Identification of mutations in genomic DNA sequencing data obtained from samples of each colony phenotype. Breseq was used to map the sequencing reads to the reference genome AM406671 *Lactococcus lactis* subsp. *cremoris* MG1363, complete genome.

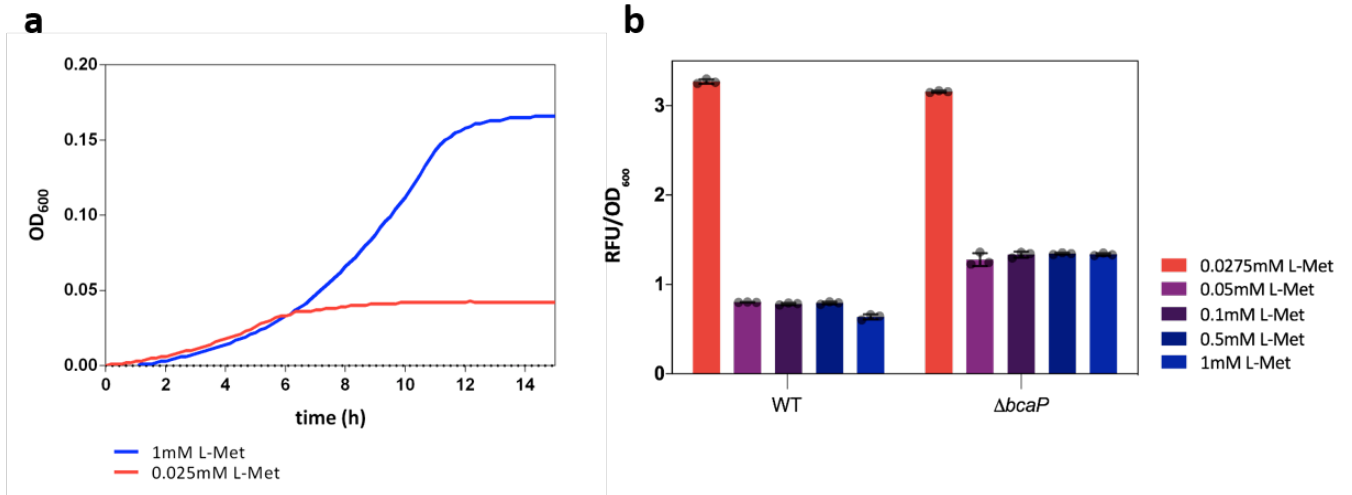

**Supplementary Figure 6 | Effect of the deletion of *bcaP* from the chromosome of *L. lactis* on growth and *met* expression.** **a**, The  $\Delta bcaP$  strain grows slower compared to the wild type due to the fact that BcaP imports the branched-chain amino acids in *L. lactis*. Growth curves (OD<sub>600</sub>) of *L. lactis*  $\Delta bcaP$  in CDM with low and high concentrations of methionine (0.025 mM in red and 1 mM in blue). **b**, Population-level normalized GFP expression (RFU/OD<sub>600</sub>) of *L. lactis* MG1363 cultures, wild-type (WT) and *bcaP* deletion mutant ( $\Delta bcaP$ ) strains, in CDM with increasing concentration of methionine (0.0275 mM to 1 mM, left to right bars). Dots represent independent experiments (n=3). Error bars represent standard deviation (SD) of the mean values of the three independent experiments.

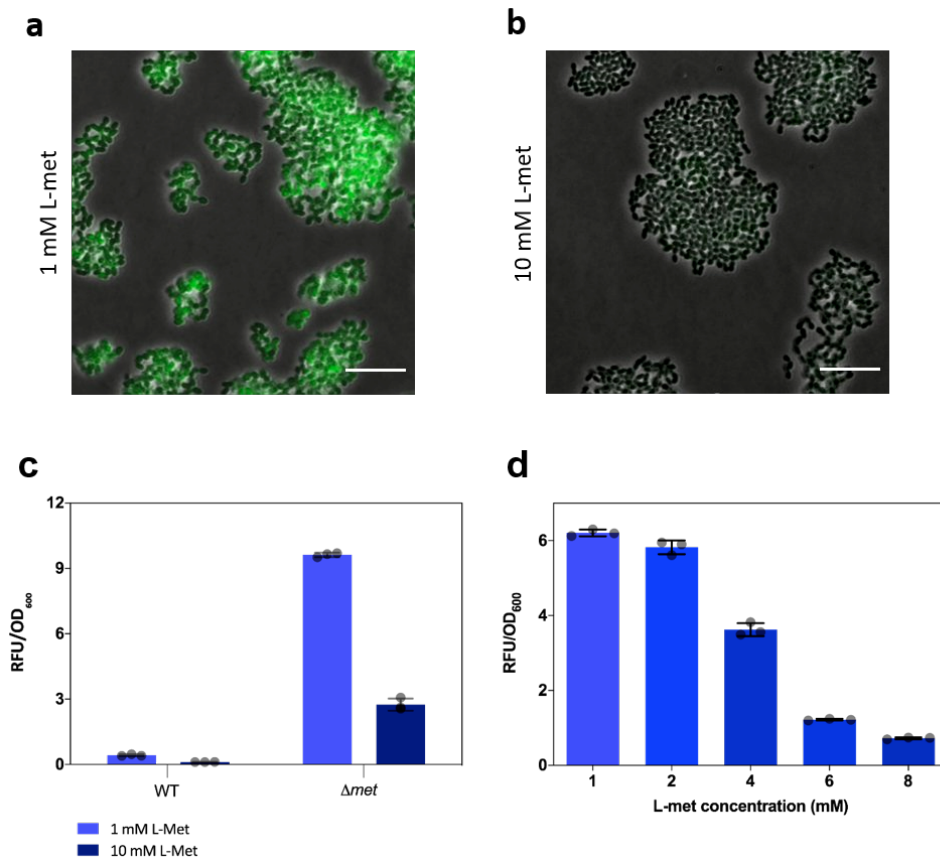

**Supplementary Figure 7 | Deletion of the *met* promoter from the chromosome of *L. lactis* *Pmet-gfp* results in homogeneous activation of the *met* promoter.** **a** and **b**, The *L. lactis*  $\Delta met$  *Pmet-gfp* strain shows homogenous *met* expression. Snapshots of *L. lactis* *Pmet-gfp* cells by fluorescence microscopy at methionine concentrations of 1 mM and 10 mM. Images acquired by fluorescence microscopy. Overlays of green fluorescence and phase-contrast images are shown (Supplementary Video 5 and 6). Scale bars, 15  $\mu$ m. **c**, Since the *L. lactis*  $\Delta met$  strain requires higher concentrations of methionine to grow, the *met* expression in this strain is activated at a methionine concentration of 1 mM. Population-level normalized GFP expression (RFU/OD<sub>600</sub>) of *L. lactis* *Pmet-gfp* cultures, wild-type (WT) and *met* deletion mutant ( $\Delta met$ ) strains, in CDM with low and high concentrations of methionine (1 mM and 10 mM, left to right bars). Data are presented as mean  $\pm$  S.D. Dots represent independent experiments (n=3). Error bars represent standard deviation (SD) of the mean values of the three independent experiments. **d**, The activation of the *met* expression in the *L. lactis*  $\Delta met$  strain is inversely proportional to the methionine concentration. Population-level normalized GFP expression (RFU/OD<sub>600</sub>) of *L. lactis*  $\Delta met$  *Pmet-gfp* cultures in CDM with increasing concentrations of methionine (1 mM to 10 mM, left to right bars). Data are presented as mean  $\pm$  S.D. Dots represent independent experiments (n=3). Error bars represent standard deviation (SD) of the mean values of the three independent experiments.

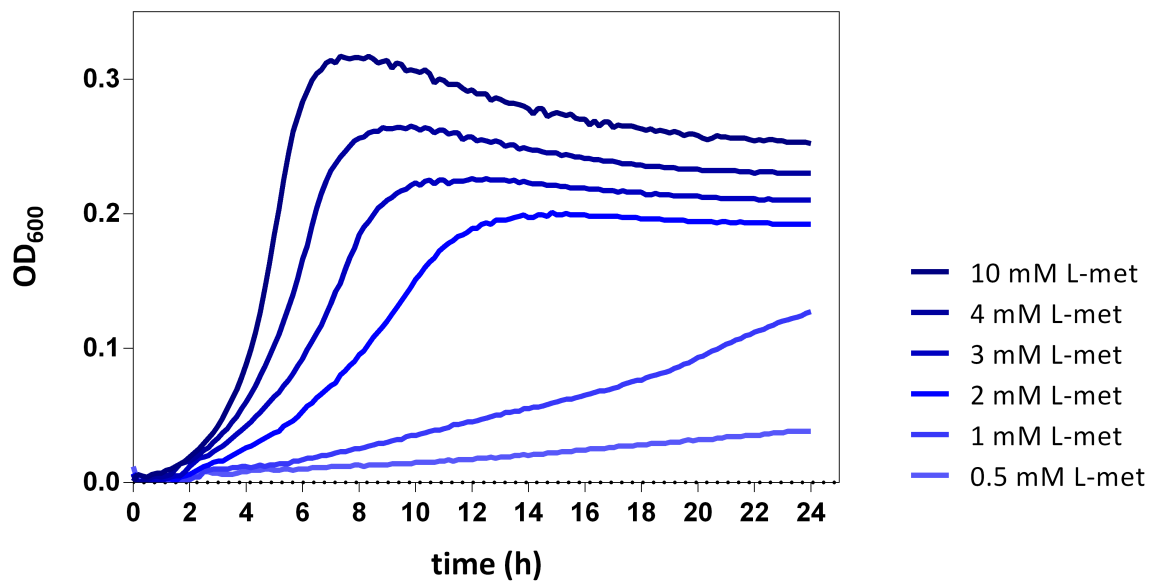

**Supplementary Figure 8 | The *L. lactis*  $\Delta met$  strain requires higher methionine concentrations to grow.** Growth curves (OD<sub>600</sub>) of *L. lactis*  $\Delta met$  cultures, performed in CDM with different methionine concentrations (0.5 mM to 10 mM).

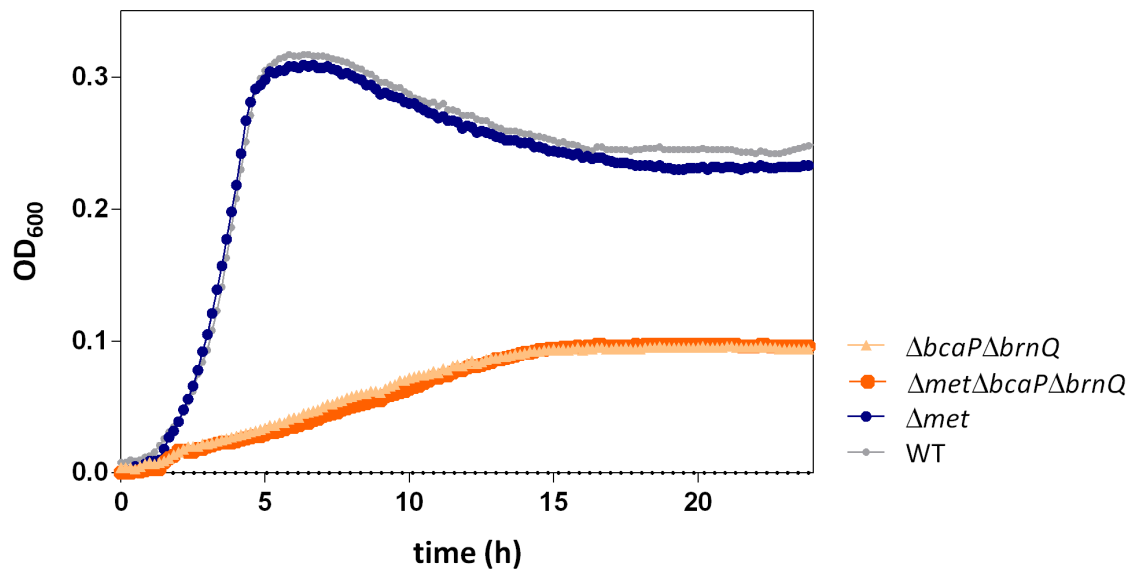

**Supplementary Figure 9 | The BcaP and Met-transporters are the only two systems able to import methionine in *L. lactis*.** Previous studies show that the lack of BcaP is partially compensated by a low-affinity BCAA transport system II carrier protein (BrnQ). Therefore, a triple deletion mutant strain ( $\Delta met\Delta bcaP\Delta brnQ$ ) was constructed in order to investigate whether another methionine transporter, besides Met and BcaP, is present in *L. lactis*. At a high methionine concentration of 10 mM, *L. lactis*  $\Delta met$  (in dark blue) shows similar growth to the wild-type strain (gray) due to the methionine import via BcaP. In contrast, no differences in growth between the triple-mutant ( $\Delta met\Delta bcaP\Delta brnQ$ ) (in dark orange) and a double mutant ( $\Delta bcaP\Delta brnQ$ ) (in light orange) were observed in CDM with a high methionine concentration of 10 mM. Thus, it appears that BrnQ is unable to transporter methionine. Although, the triple-mutant strain ( $\Delta met\Delta bcaP\Delta brnQ$ ) does grow in CDM with a prolonged lag phase (in dark orange) and reaches lower final cell-density compared to the wild-type strain (in gray).

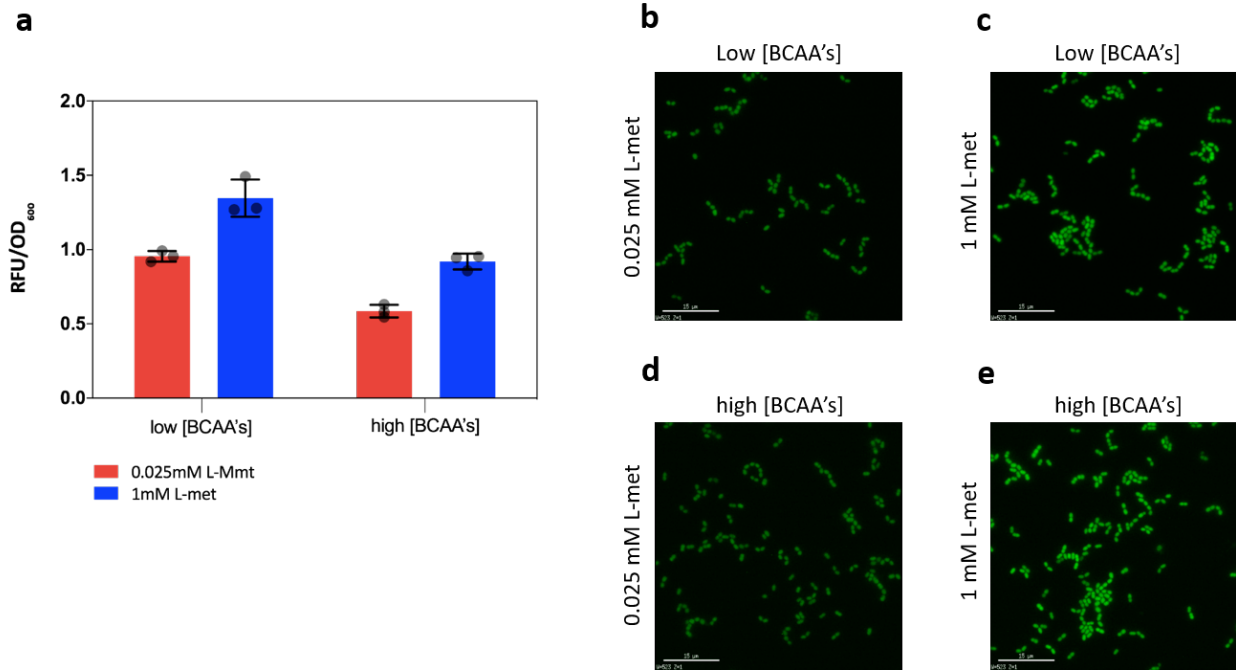

**Supplementary Figure 10 | Methionine competes with branched-chain amino acids for BcaP.** **a**, Population-level normalized GFP expression (RFU/OD<sub>600</sub>) of *L. lactis* MG1363 *Pbcap-gfp* construct, in CDM with increasing concentration of methionine (0.025 mM to 1 mM, red and blue bars respectively), and the presence of low or high branched-chain amino acid concentration: low BCAA's (leucine 0.4 mM, isoleucine 0.2 mM, valine 0.23 mM) and high BCAA's (leucine 4 mM, isoleucine 2 mM and valine 2.3 mM). Data are presented as mean  $\pm$  S.D. Dots represent independent experiments (n=3). Error bars represent standard deviation (SD) of the mean values of the three independent experiments. **b** and **c**, Snapshots of observations by fluorescence microscopy of *L. lactis* *Pbcap-gfp* at exponential growth phase in medium with low and high methionine concentrations (0.025 mM and 1 mM **b** and **c** respectively), performed in CDM with low branched-chain amino acids concentrations. **d** and **e**, Snapshots of observations by fluorescence microscopy of *L. lactis* *Pbcap-gfp* at exponential growth phase in medium with low and high methionine concentrations (0.025 mM and 1 mM, **d** and **e** respectively), performed in CDM with high branched-chain amino acids concentrations.

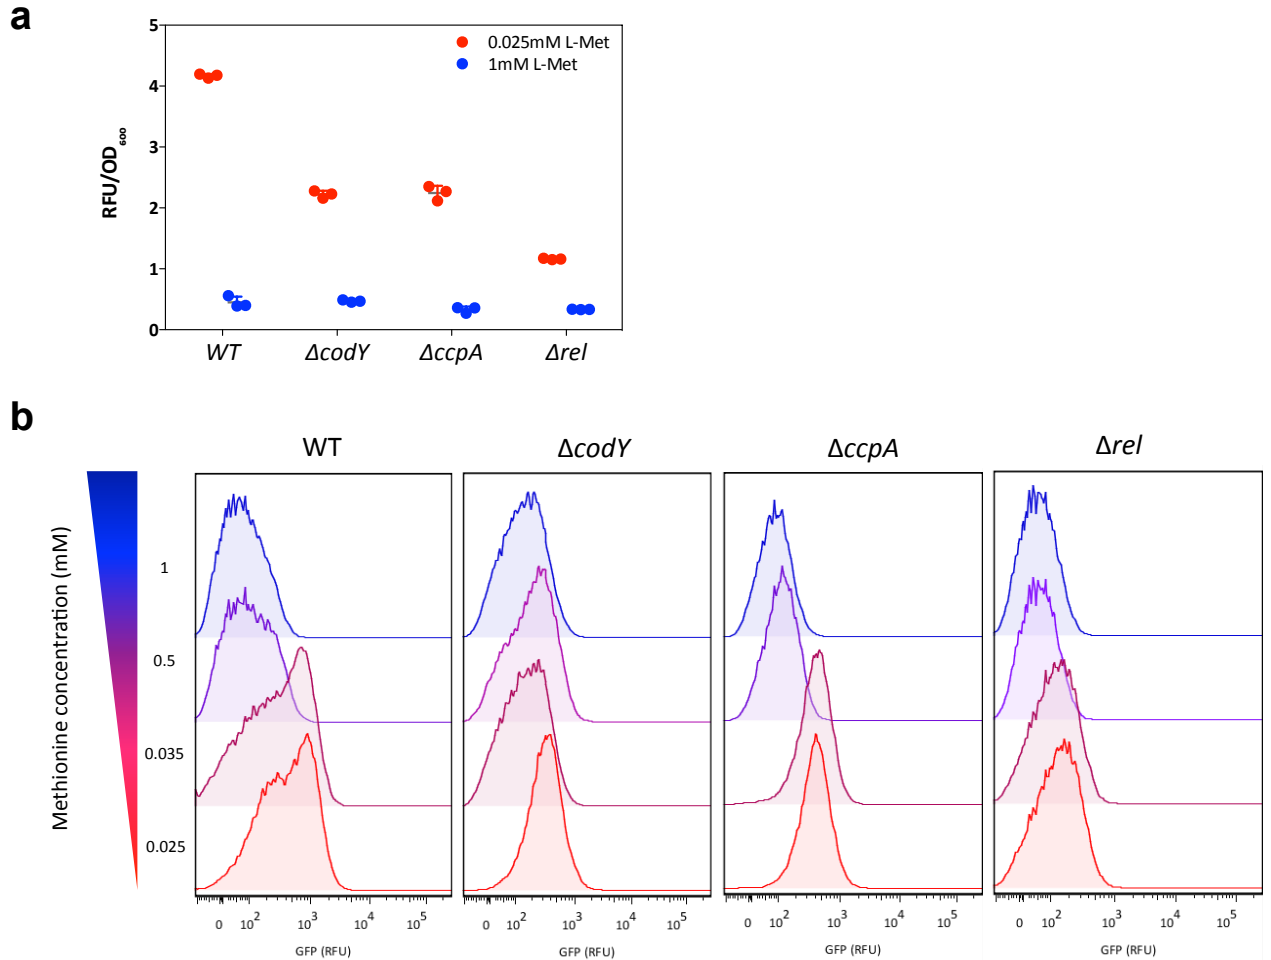

**Supplementary Figure 11 | The role of global regulators on the expression of the *met* operon.** **a**, Deletion of *codY*, *ccpA*, or *rel* from the chromosome of *L. lactis Pmet-gfp* decreases the activation of the *met* promoter at low methionine concentrations. Remarkably the deletion of *rel* shows the lowest *met* expression at low concentrations of methionine (0.025 mM). Furthermore, there is a similar effect with the deletion of *codY*, which may be explained by the fact that *bcaP* becomes highly expressed without the repression by CodY, and therefore the requirement of the Met transporter decreases. Note: the wild type shown in this figure is the same as in Figure 6. Population-level normalized GFP expression (RFU/OD<sub>600</sub>) of *L. lactis Pmet-gfp* cultures in CDM with low (red) and high (blue) concentrations of methionine (0.025 mM and 1 mM). Dots represent each independent experiments (n=3). Error bars represent standard deviation (SD) of the mean values of the three independent experiments. **b**, Single-cell GFP measurements by flow cytometry at different concentrations of methionine (0.025 mM to 1 mM). 10,000 ungated events for each sample are shown.

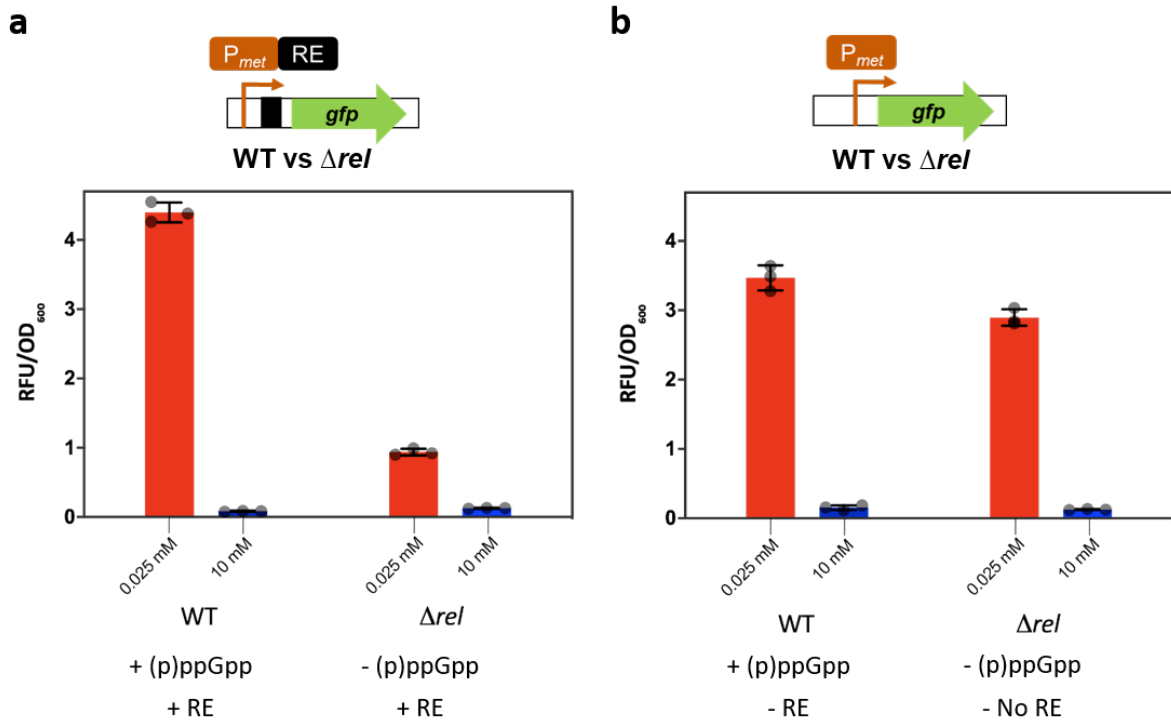

**Supplementary Figure 12 | Rel plays a role in the regulation of the *met* promoter. a,** Population-level normalized GFP expression (RFU/OD<sub>600</sub>) of *L. lactis* cultures wild-type strain and *rel* deletion mutant, bearing the *met* promoter (including the regulatory element RE) fused to the *gfp* gene. Cells are propagated in CDM with low and high methionine concentrations (0.025 mM in red and 10 mM in blue). Data are presented as mean  $\pm$  S.D. Dots represent independent experiments (n=3). Error bars represent standard deviation (SD) of the mean values of the three independent experiments. **b,** Population-level normalized GFP expression (RFU/OD<sub>600</sub>) of *L. lactis* cultures wild-type and *rel* deletion mutant strains, bearing a variant of the *met* promoter (lacking the regulatory element RE) fused to the *gfp* gene. Cells are propagated in CDM with low and high methionine concentrations (0.025 mM in red and 10 mM in blue). Error bars represent standard deviation (SD) of the mean values of three samples (n = 3).

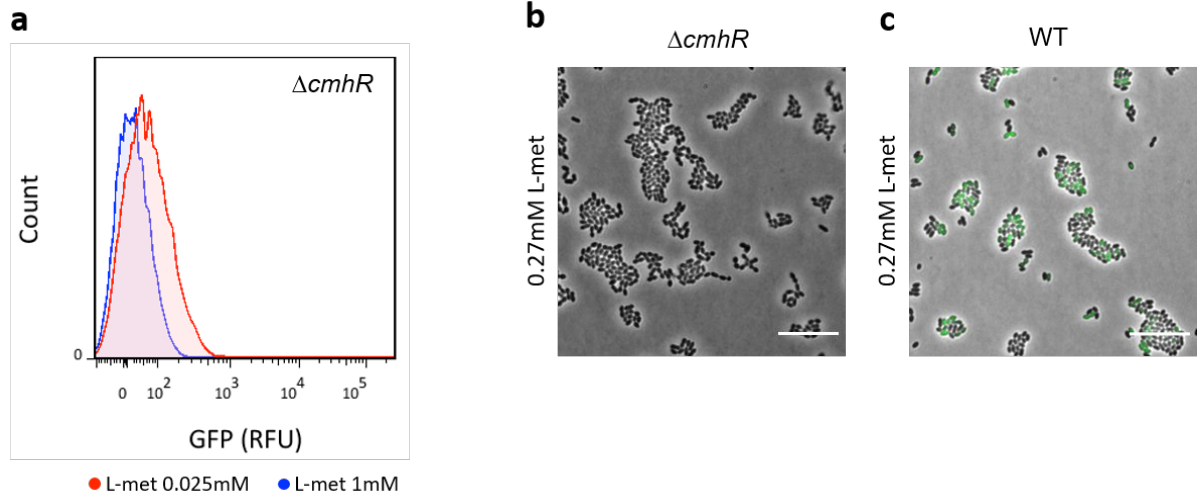

**Supplementary Figure 13 | The transcription factor CmhR regulates the *met* promoter.**

**a**, The deletion of *cmhR* from the chromosome of *L. lactis* *Pmet-gfp* results in no *met* expression at different methionine concentrations (0.025 mM in red, and 1 mM in blue). 10,000 ungated events for each sample are shown. **b** and **c** Snapshots of cells of the wild-type and  $\Delta cmhR$  strains by fluorescence microscopy in standard CDM that contains 0.27 mM methionine. No Met-transporter expression is observed in the  $\Delta cmhR$  strain. Overlays of green-fluorescence and phase-contrast images are shown. Scale bars, 15  $\mu$ m.

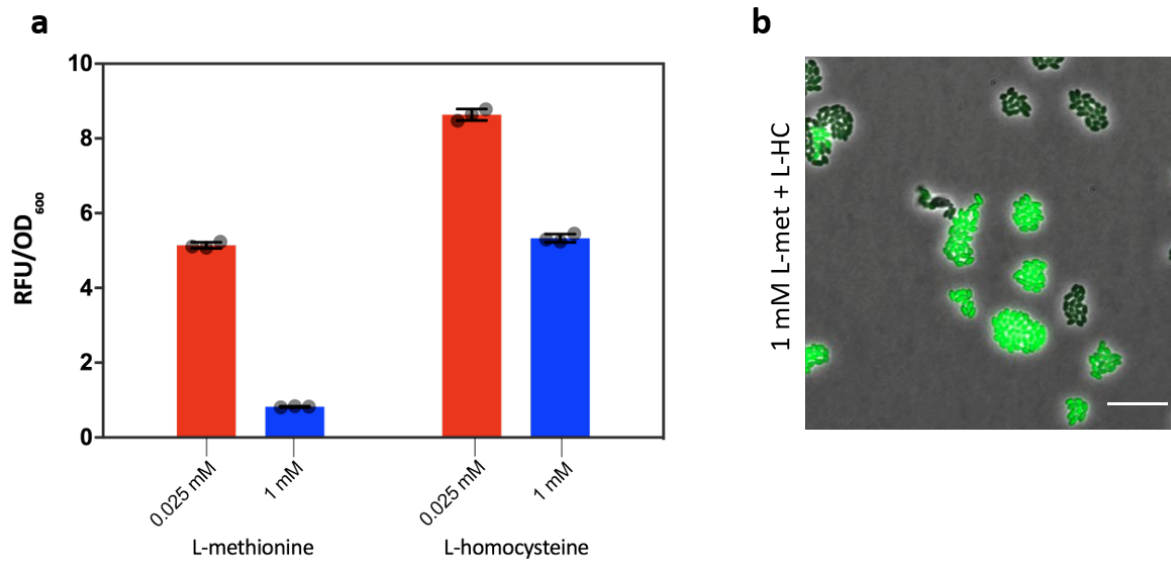

**Supplementary Figure 14 | L-homocysteine increases the expression of the Met-transporter.** **a**, Since homocysteine can be converted to methionine, *L. lactis* is able to grow in CDM containing L-homocysteine instead of methionine. The expression of the *met* operon is enhanced with the presence of L-homocysteine, even at a high concentration of methionine (1mM). Population-level normalized GFP expression (RFU/OD<sub>600</sub>) of *L. lactis* *Pmet-gfp* cultures, in CDM with low and high methionine concentration (0.025mM and 1mM) and high and low L-homocysteine concentration (0.025 mM and 1 mM). Data are presented as mean  $\pm$  S.D. Dots represent independent experiments (n=3). Error bars represent standard deviation (SD) of the mean values of the three independent experiments. **b** Snapshot of microscopy observation of *L. lactis* *Pmet-gfp* strain in CDM with high methionine (1 mM) and L-homocysteine at a concentration of 0.27 mM (Supplementary Video 8). An overlay of green fluorescence and phase-contrast images is shown. Error bars represent standard deviation (SD) of the mean values of three samples (n = 3). Scale bar, 15  $\mu$ m.

Name: T-box  
Type: RNA regulatory element  
Effector: Met-tRNA

**Regulog T-box(Met)** *RegPrecise 3.0 database*

| Regulated operon | Function                   | Genomes                                                                                           |
|------------------|----------------------------|---------------------------------------------------------------------------------------------------|
| <i>metNPQ</i>    | Methionine ABC transporter | <i>L. lactis</i> subsp. <i>lactis</i><br>IL1403, <i>L. lactis</i> subsp.<br><i>cremoris</i> SK11, |

***L. lactis* subsp. *cremoris* MG1363** *RibEx: Riboswitch explorer*

|         | T-box motifs                             | Putative regulated operon | Function                   | P-value  |
|---------|------------------------------------------|---------------------------|----------------------------|----------|
| Motif 1 | cttaaATCAAGAATGGTACCACGATATAGCTCGTTtcttt |                           |                            |          |
| Motif 2 | tttatGAAATGGGCTCTTTTGTGTTAGTCAGAttgtt    | <i>plpABCD-ydcB-ydcC</i>  | Methionine ABC transporter | 3.38e-08 |
| Motif 3 | tcagtACAGAGAGCTTGTAGCGGTGAagca           |                           |                            |          |

**Supplementary Figure 15 | A T-box riboswitch is located upstream the *met* operon.** The T-box riboswitch is a well-known regulatory element (RFAM: RF00230), which is predicted by RegPrecise 3.0 database to regulate the *metNPQ* operon (named *met* operon in our study) in *Lactococcus lactis*. We identified three motifs belonging to the T-box leader in the genome of *L. lactis* MG1363 by RibEx: Riboswitch explorer, these motifs are located upstream the *met* operon (*plpABCD-ydcB-ydcC*) encoding the methionine ABC transporter, in a similar way to other species of *L. lactis*. The *P*-value is calculated by RibEx assuming a hypergeometrical distribution, for each motif to be overrepresented in a given COG or KEGG pathway, with the Motif Alignment and Search Tool (MAST) algorithm<sup>1,2</sup>.

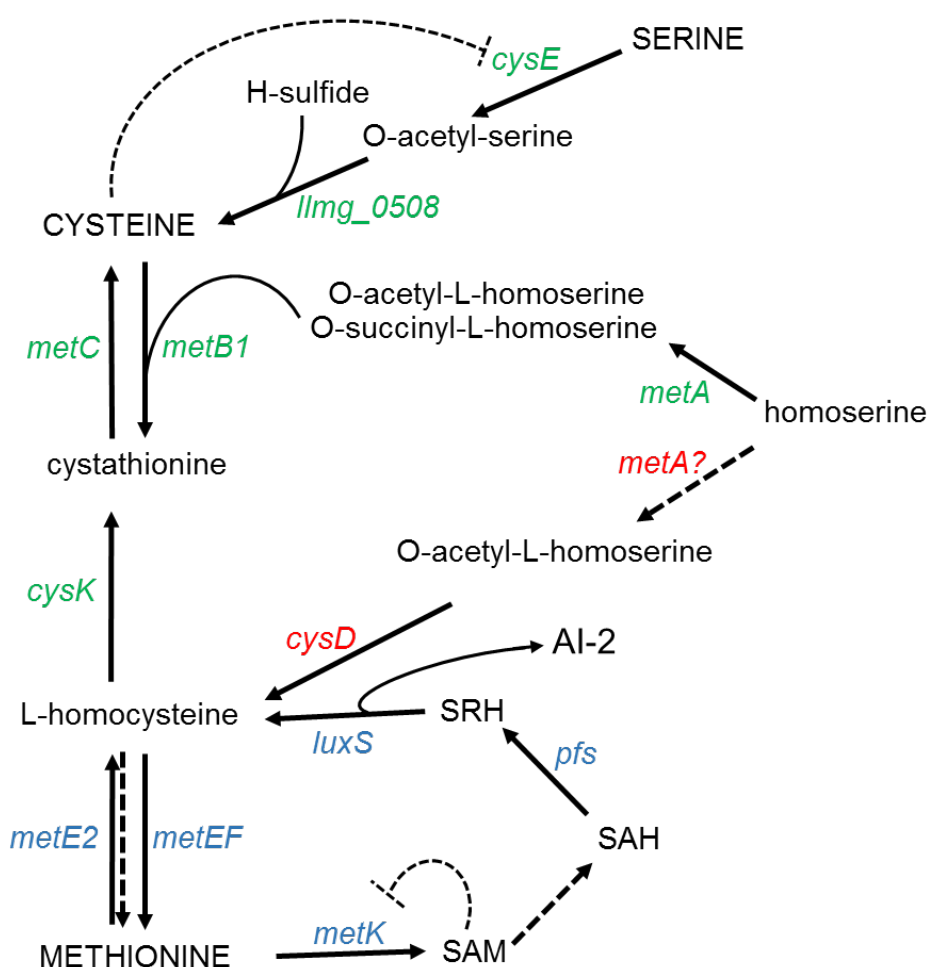

**Supplementary Figure 16 | Impaired methionine biosynthesis pathways in *L. lactis* MG1363.** Although methionine can potentially be synthesized using L-homocysteine as a substrate, experimentally this bacterium is an auxotroph for methionine. The pool of homocysteine is derived from a recycling pathway via *metk*, *pfs* and *luxS*, or via interconversion of homoserine into L-homocysteine by *metA* and *cysD*. We speculate that either the amounts of methionine produced by this pathways is not enough to let the bacteria proliferate or the biosynthetic pathways are impaired by gene mutations. In a review of the literature, Sperandio *et al*, 2010 described the sulfur amino acid metabolism in the *L. lactis* IL1403 strain<sup>3</sup>, and showed that cysteine might enter by an interconversion pathway to methionine. This conversion is not possible in *L. lactis* MG1363 due to the lack of the enzyme YtjE that converts cystathionine into homocysteine. In this diagram, we highlight three transcriptional regulators participating in these biosynthetic pathways: genes regulated by CmbR in green, genes regulated by CodY in red, and genes that are potentially regulated by CmHr in blue.

## a DNA

In **red** regulatory element (RE)

5' AAAAAAACTCCTTTTGTATGCGCACAAAAGGAGGGTTAGAAATTAGACGATTGTCTTAACACATCCCT  
ACGCTGGCATTACCCAGATCAGGTCAGATGGTATTTCTCGCTACTGACAGACTTGTCAATAGACCCATTGT  
GCAAAATATTTATTTTACAAGTTTAAGTTTAGCATAATTTATGTTGAAAAGCATTGATGGGAGATTAGAAT  
TCTATTTTATAAATTAACTTAAAAATTTTAAAGGCAACATAAAAAATCAATAATCCAAAAATTTGAAA  
GTCTGTTAGAATAAATCT**ATACACAAATTCGGACAAAATAAAAGCGGTCGAGTAAGTAATTGTGAAAGTCA**  
**+1**  
**GTACAGAGAGCTTGTAGCGGTGAGAGCAAGCCTGAATGAAGCAATGAAAATGGCTTGATAAGCGTAGCAAA**  
**AGTGAGGTTTACCAAGCTTTTGACGGCATGGTTCTCGTTATTGAACTTAAAAGTTTGCTTTTGTAAAGTT**  
**TATCTGAAAATTTTCAGTGAGCTACAAAGTGCTTAAATCAAGAATGGTACCACGATATAGCTCGTTTCTTT**  
**TTATGAAATGGGCTCTTTTGTTTAGTCAGATTGTTTTTGTGACGAATTTGTTTAGAGTCAGAAAATTG**  
**GCAGGTGCACGGTTAATTTCTGATATGTCGAGTACTGATTAATAAAGGAGGACAAACATG3'**

## b RNA

In **red** highly conserved nucleotides, **blue** terminator sequence, **green** the specifier for methionine

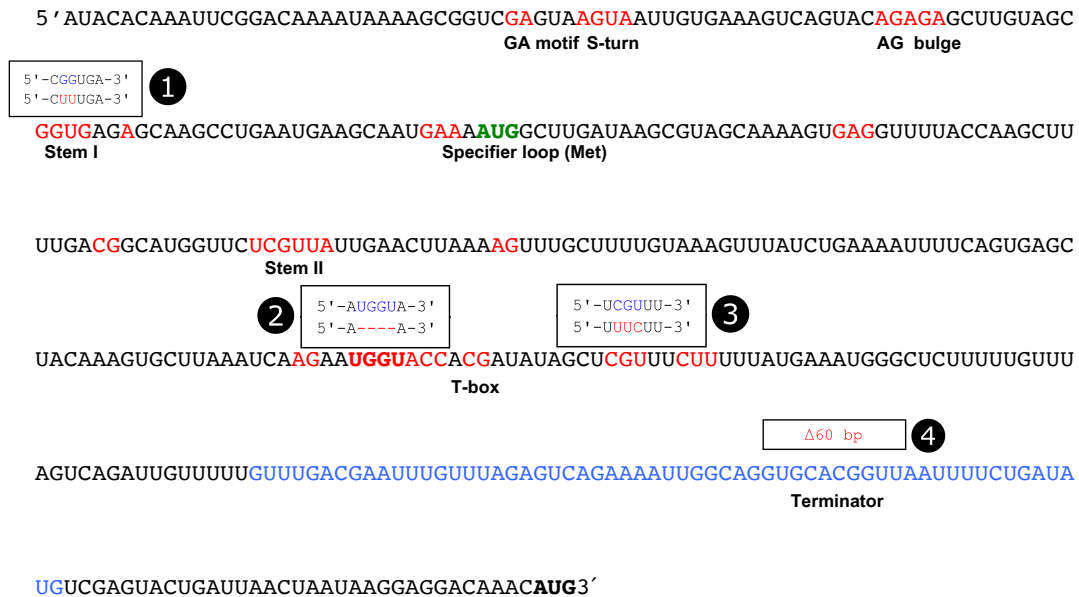

**Supplementary Figure 17 | Analysis of the 5' UTR of the *met* operon.** a, The DNA sequence shows the transcription start site (+1), and the regulatory element (RE) deleted in the *Pmet(-RE)-gfp* strain (Fig. 5d) is shown in red. b, The RNA sequence shows the identified domains, elements, and conserved nucleotides among T-box riboswitches. The identification of these structural elements is based on previous studies<sup>4-6</sup>. Moreover, the four mutations introduced to the riboswitch in this study (Fig. 6) are highlighted with numbers.



**Supplementary Table 1 | Oligonucleotides used in this study**

| Name            | Sequence                                        |
|-----------------|-------------------------------------------------|
| metFw           | 5' CTCTGCGCATGCTTTGGAATGAGGCTGATGATGAAGG 3'     |
| metRv           | 5' CTCGAGTTGATTTATTTTTTCAAAATCAATTATTCCTTTG 3'  |
| met(-RE)_Rv     | 5' CTTTCACTCGAGCTTACTCGACCGCTTTTATTTTG 3'       |
| bcaP_Fw         | 5' TAAGAAGCATGCCAGTTGAAAGTTTTCACGAGGTTC 3'      |
| bcaP_Rv         | 5' TAAATCCTCGAGTTTCTGAATTTGTAATAATAATTTC 3'     |
| A_metKO_Fw      | 5' TTATTAGGTACCACTATGGATAAAAAGTTTAG 3'          |
| A_metKO_Rv      | 5' TTGACAAGAATTCTAAAAATAAATATTTGCACAATG 3'      |
| B_metKO_Fw      | 5' GGGAGAGGATCCGAATCCAAGAAACAGAAATAT 3'         |
| B_metKO_Rv      | 5' CACTATCTTTGTTTACAGGTTTCGCGGCCGCTAGACTC 3'    |
| met_promoter_Fw | 5' AAGCTGAGAAGAAGGATAGGGATA 3'                  |
| met_promoter_Rv | 5' GCAGCGATAGCAACAATTACAACAAC 3'                |
| Fw (qRT-PCR)    | 5' ACACAAATTCGGACAAAATAAAAAG 3'                 |
| Rv2 (qRT-PCR)   | 5' GAAAATTAACCGTGCACCTG 3'                      |
| Rv8 (qRT-PCR)   | 5' CTTCATTCAGGCTTGCTCTC 3'                      |
| rpoE-Fw         | 5' GAAGTCATCGCTCTTGACGAA 3'                     |
| rpoE-Rv         | 5' TCTGGGTCGATTTTCGTCTTC 3'                     |
| rarA-Fw         | 5' TGCAGAGCAGACAGCAAATC 3'                      |
| rarA-Rv         | 5' ACACCGCGTTACCCTAGATG 3'                      |
| Mut1-Fw         | 5' GTCAGTACAGAGAGCTTGTAGCTTTGAGAGCAAGC 3'       |
| Mut1-Rv         | 5' GCTTCATTCAGGCTTGCTCTCAAAGCTACAAGCTC 3'       |
| Mut2-Fw         | 5' GCTACAAAGTGCTTAAATCAAGAAACCACGATATAGC 3'     |
| Mut2-Rv         | 5' GAAACGAGCTATATCGTGGATTCTTGATTTAAGC 3'        |
| Mut3-Fw         | 5' GGTACCACGATATAGCTTTCTTCTTTTTATGAAATGGGC 3'   |
| Mut3-Rv         | 5' CAAAAAGAGCCCATTTTCATAAAAAGAAGAAAGCTATATCG 3' |
| Mut4-Rv         | 5' CAAATTCCTCGAGCAAAAACAATCTGACTAAACAAAAGAG 3'  |

**Supplementary Table 2 | Constructed strains in this study**

| Name                                 | Description                                                                                                                                                                                             |
|--------------------------------------|---------------------------------------------------------------------------------------------------------------------------------------------------------------------------------------------------------|
| <i>L. lactis Pmet-gfp</i>            | <i>L. lactis</i> wild-type strain MG1363, <i>llmg_pseudo10::Pmet-gfp</i> , Ery <sup>r</sup>                                                                                                             |
| <i>L. lactis ΔbcaP Pmet-gfp</i>      | <i>L. lactis</i> MG1363 <i>bcaP</i> deletion mutant, <i>llmg_pseudo10::Pmet-gfp</i> , Ery <sup>r</sup>                                                                                                  |
| <i>L. lactis Δmet Pmet-gfp</i>       | <i>L. lactis</i> MG1363 <i>met</i> deletion mutant, <i>llmg_pseudo10::Pmet-gfp</i> , Ery <sup>r</sup>                                                                                                   |
| <i>L. lactis ΔcmhR Pmet-gfp</i>      | <i>L. lactis</i> MG1363 <i>cmhR</i> deletion mutant, <i>llmg_pseudo10::Pmet-gfp</i> , Ery <sup>r</sup>                                                                                                  |
| <i>L. lactis Δrel Pmet-gfp</i>       | <i>L. lactis</i> MG1363 <i>rel</i> deletion mutant, <i>llmg_pseudo10::Pmet-gfp</i> , Ery <sup>r</sup>                                                                                                   |
| <i>L. lactis ΔccpA Pmet-gfp</i>      | <i>L. lactis</i> MG1363 <i>ccpA</i> deletion mutant, <i>llmg_pseudo10::Pmet-gfp</i> , Ery <sup>r</sup>                                                                                                  |
| <i>L. lactis ΔcodY Pmet-gfp</i>      | <i>L. lactis</i> MG1363 <i>codY</i> deletion mutant, <i>llmg_pseudo10::Pmet-gfp</i> , Ery <sup>r</sup>                                                                                                  |
| <i>L. lactis ΔbcaPΔbrnQ Pmet-gfp</i> | <i>L. lactis</i> MG1363 <i>bcaP</i> and <i>brnQ</i> deletion mutant, <i>llmg_pseudo10::Pmet-gfp</i> , Ery <sup>r</sup>                                                                                  |
| <i>L. lactis ΔmetΔbcaPΔbrnQ</i>      | <i>L. lactis</i> MG1363 <i>met</i> , <i>bcaP</i> and <i>brnQ</i> deletion mutant                                                                                                                        |
| <i>L. lactis Pmet(-RE)-gfp</i>       | <i>L. lactis</i> MG1363, <i>llmg_pseudo10::Pmet(-RE)-gfp</i> . <i>Pmet(-RE)</i> is a variant of the <i>met</i> promoter, lacking the full T-box riboswitch, Ery <sup>r</sup>                            |
| <i>L. lactis Δrel Pmet(-RE)-gfp</i>  | <i>L. lactis</i> MG1363 <i>rel</i> deletion mutant, <i>llmg_pseudo10::Pmet(-RE)-gfp</i> . <i>Pmet(-RE)</i> is a variant of the <i>met</i> promoter, lacking the full T-box riboswitch, Ery <sup>r</sup> |
| <i>T-box mutant 1</i>                | <i>L. lactis</i> MG1363, <i>llmg_pseudo10::Pmet(mut1)-gfp</i> . Mutant 1 corresponds to G27T, G73T. Ery <sup>r</sup>                                                                                    |
| <i>T-box mutant 2</i>                | <i>L. lactis</i> MG1363, <i>llmg_pseudo10::Pmet(mut1)-gfp</i> . Mutant 2 corresponds to ΔUGGU. Ery <sup>r</sup>                                                                                         |
| <i>T-box mutant 3</i>                | <i>L. lactis</i> MG1363, <i>llmg_pseudo10::Pmet(mut1)-gfp</i> . Mutant 3 corresponds to C258U, G259U, U260C. Ery <sup>r</sup>                                                                           |
| <i>T-box mutant 4</i>                | <i>L. lactis</i> MG1363, <i>llmg_pseudo10::Pmet(mut1)-gfp</i> . Mutant 4 corresponds to Δ306-365. Ery <sup>r</sup>                                                                                      |

**Supplementary Table 3 | Number of generations in *L. lactis* colonies**

| Colonies on CDM-agar plate with methionine 0.025 mM |                       |                       |                      |                       | Colonies on CDM-agar plate with methionine 10 mM |                       |
|-----------------------------------------------------|-----------------------|-----------------------|----------------------|-----------------------|--------------------------------------------------|-----------------------|
|                                                     | <i>Phenotype</i>      |                       |                      |                       | <i>Phenotype</i>                                 |                       |
|                                                     | <i>GFP + colonies</i> |                       | <i>GFP- colonies</i> |                       | <i>GFP- colonies</i>                             |                       |
| number of coloy                                     | number of cells       | number of generations | number of cells      | number of generations | number of cells                                  | number of generations |
| 1                                                   | 2729                  | 13.74                 | 1515                 | 12.89                 | 1147                                             | 12.49                 |
| 2                                                   | 466                   | 11.19                 | 509                  | 11.31                 | 561                                              | 11.45                 |
| 3                                                   | 1379                  | 12.75                 | 1250                 | 12.61                 | 714                                              | 11.80                 |
| 4                                                   | 2624                  | 13.68                 | 1009                 | 12.30                 | 635                                              | 11.63                 |
| 5                                                   | 2492                  | 13.61                 | 1275                 | 12.64                 | 1158                                             | 12.50                 |
| 6                                                   | 945                   | 12.21                 | 513                  | 11.32                 | 723                                              | 11.82                 |
| 7                                                   | 590                   | 11.53                 | 1530                 | 12.90                 | 1053                                             | 12.36                 |
| 8                                                   | 1196                  | 12.55                 | 324                  | 10.66                 | 2178                                             | 13.41                 |
| 9                                                   |                       |                       | 726                  | 11.83                 | 3729                                             | 14.19                 |
| 10                                                  |                       |                       | 1675                 | 13.03                 | 1972                                             | 13.27                 |
| 11                                                  |                       |                       |                      |                       | 868                                              | 12.08                 |
|                                                     | mean ± SD             | 12.65 ± 0.98          | mean ± SD            | 12.15 ± 0.82          | mean ± SD                                        | 12.45 ± 0.85          |

**Supplementary Table 4 | Regulation mechanism of the methionine transport in different phylogenetic clades**

| Phylogenetic clade       | Regulation on methionine transport                        |
|--------------------------|-----------------------------------------------------------|
| <i>Clostridia</i>        | S-box attenuation mechanism                               |
| <i>B. subtilis</i> group | S-box attenuation mechanism                               |
| <i>B. cereus</i> group   | S-box attenuation mechanism                               |
| <i>Lactobacilli</i>      | T-box attenuation mechanism                               |
| <i>Staphylococci</i>     | S-box attenuation mechanism / T-box attenuation mechanism |
| <i>Streptococci</i>      | Protein transcription factors (MtaR/MetR/CmbR)            |

Strategy in the regulation of methionine transporter in different phylogenetic clades, based on genomic studies. The S-box mechanism was lost in the Streptococcaceae and Lactobacillales lineages, and the role of regulation was assumed by the Met-T-box mechanism in lactobacilli and transcription factors in streptococci. Methionine auxotrophy has been reported in organisms belonging to the *Lactobacilli* and *Streptococci* clades.

## Supplementary References

1. Bailey, T. L. & Gribskov, M. Combining evidence using p-values: Application to sequence homology searches. *Bioinformatics* **14**, 48-54 (1998).
2. Abreu-Goodger, C. & Merino, E. RibEx: A web server for locating riboswitches and other conserved bacterial regulatory elements. *Nucleic Acids Res.* **33**, 690-692 (2005).
3. Sperandio, B. *et al.* Three paralogous LysR-type transcriptional regulators control sulfur amino acid supply in *Streptococcus mutans*. *J. Bacteriol.* **192**, 3464-3473 (2010).
4. Liu, L. C., Grundy, F. J. & Henkin, T. M. Non-conserved residues in *Clostridium acetobutylicum* tRNA<sup>Ala</sup> contribute to tRNA tuning for efficient antitermination of the *alaS* T Box riboswitch. *Life*. **5**, 1567-1582 (2015).
5. Zhang, J. *et al.* Specific Structural Elements of the T-Box Riboswitch Drive the Two-Step Binding of the tRNA Ligand. *Elife*. **7**, e39518 (2019).
6. Green, N. J., Grundy, F. J. & Henkin, T. M. The T box mechanism: tRNA as a regulatory molecule. *FEBS Letters*. **584**, 318-324 (2010).
